# Supplementary material
Source: publisher figshare collection journal article supplement (https://gsapubs.figshare.com/ndownloader/files/23301029)
Supplement: Supplementary file 1 [file 23301029]

## Sheet: Hoja1
TABLE DR1. U-Pb ZIRCON AGES FROM THE PAYANDÉ, IBAGUÉ AND MARIQUITA PLUTONS
Sample name	U (ppm)	Th/U	238U/206Pb	1σ % error	207Pb/206Pb	1σ % error	206Pb/238U Age	1σ absolute error	207Pb/206Pb Age	1σ absolute error	Best age (Ma)	1σ absolute error (Ma)
Payandé stock
CSP 3
CSP3_32	313.143	0.651181	39.9089	1.65559	0.0495156	1.49162	159.538	2.60834	172.315	34.45	159.538	2.60834
CSP3_31	231.124	0.955078	37.4815	1.69023	0.0490835	1.68949	169.735	2.83084	151.816	39.114	169.735	2.83084
CSP3_30	255.893	0.729427	36.3003	1.69548	0.0486097	1.54715	175.184	2.92954	129.035	36.0163	175.184	2.92954
CSP3_29	393.157	0.895912	38.6708	1.55836	0.0490547	1.3712	164.581	2.53179	150.441	31.8255	164.581	2.53179
CSP3_28	669.352	1.28062	38.4188	1.55065	0.0492067	1.14793	165.647	2.53538	157.689	26.6493	165.647	2.53538
CSP3_27	321.192	0.79454	39.5844	1.62249	0.0502891	1.59542	160.829	2.57664	208.378	36.5791	160.829	2.57664
CSP3_26	327.185	0.950451	37.9551	1.59029	0.0490943	1.46945	167.644	2.63112	152.332	34.0697	167.644	2.63112
CSP3_25	542.251	1.16386	39.4498	1.64058	0.0554125	1.71178	161.371	2.61403	428.905	37.7144	161.371	2.61403
CSP3_24	773.906	0.861645	39.5626	1.49287	0.0474481	2.93187	160.917	2.37211	71.8405	68.2768	160.917	2.37211
CSP3_23	399.857	0.661692	40.4754	1.69124	0.0486735	3.30211	157.332	2.62811	132.134	75.8596	157.332	2.62811
CSP3_22	233.434	0.805871	38.823	1.57063	0.0481281	3.11647	163.944	2.54199	105.569	72.0365	163.944	2.54199
CSP3_21	262.909	0.839779	41.9038	1.47621	0.0487419	3.11251	152.031	2.21767	135.436	71.5548	152.031	2.21767
CSP3_20	290.33	0.705863	38.2684	1.4947	0.0492444	3.06543	166.289	2.45328	159.484	70.1873	166.289	2.45328
CSP3_19	570.091	0.792992	38.5645	1.49604	0.0470042	3.0123	165.029	2.4371	49.4855	70.3603	165.029	2.4371
CSP3_18	404.475	0.794553	38.6649	1.19505	0.0485444	1.50931	164.606	1.94193	125.885	35.1524	164.606	1.94193
CSP3_17	477.465	0.948452	39.7118	1.18933	0.0492647	1.53656	160.32	1.88295	160.45	35.5529	160.32	1.88295
CSP3_16	613.925	0.540729	38.5857	1.18286	0.0498756	1.31111	164.939	1.92596	189.202	30.2256	164.939	1.92596
CSP3_15	590.75	1.04054	39.3346	1.2398	0.0507745	1.44912	161.838	1.98119	230.605	33.1254	161.838	1.98119
CSP3_14	441.146	0.816526	39.5656	1.23297	0.0477625	1.43306	160.905	1.95905	87.4989	33.6534	160.905	1.95905
CSP3_13	322.63	0.825569	45.9379	1.92103	0.0492226	1.92519	138.823	2.63778	158.449	44.4399	138.823	2.63778
CSP3_12	288.979	0.738349	39.9527	1.03071	0.0488992	1.6374	159.365	1.62226	142.999	37.9802	159.365	1.62226
CSP3_11	355.929	0.787089	39.1192	0.887051	0.0486722	1.45667	162.718	1.42517	132.072	33.8989	162.718	1.42517
CSP3_10	277.436	0.57937	38.399	0.985137	0.0496006	1.60721	165.731	1.61167	176.321	37.0616	165.731	1.61167
CSP3_9	369.429	0.889185	38.179	1.01324	0.0519112	1.47946	166.674	1.66695	281.5	33.5045	166.674	1.66695
CSP3_8	391.742	0.730473	38.4863	0.928078	0.0476256	1.48597	165.36	1.51498	80.7381	34.8798	165.36	1.51498
CSP3_7	325.858	0.605736	41.7483	1.12796	0.0505225	1.52885	152.591	1.70073	219.105	35.0011	152.591	1.70073
CSP3_6	1538.26	0.741953	36.4134	1.04496	0.0534982	0.878752	174.647	1.80023	349.985	19.7423	174.647	1.80023
CSP3_5	388.252	0.674823	38.7492	1.33031	0.0489207	1.88935	164.252	2.15709	144.022	43.7483	164.252	2.15709
CSP3_4	439.132	0.879444	40.3253	1.19488	0.0489283	1.32051	157.91	1.86365	144.381	30.6998	157.91	1.86365
CSP3_3	329.065	0.858406	36.4585	1.22843	0.0567468	1.94288	174.434	2.11371	481.708	42.353	174.434	2.11371
CSP3_2	454.346	0.740421	37.5664	1.57237	0.0638766	3.80918	169.356	2.62769	737.546	78.6224	169.356	2.62769
CSP 5
CSP5_33	505.795	0.760312	38.9074	2.06332	0.0503058	2.0174	163.593	3.3321	209.148	46.1127	163.593	3.3321
CSP5_32	469.476	0.662048	37.9847	2.07273	0.0500625	1.92118	167.515	3.4265	197.895	44.0331	167.515	3.4265
CSP5_31	659.069	0.683301	37.6566	1.87537	0.0495094	1.42135	168.956	3.12662	172.016	32.8501	168.956	3.12662
CSP5_30	406.564	0.637616	37.3148	1.91013	0.0512011	1.68696	170.483	3.21297	249.895	38.365	170.483	3.21297
CSP5_29	806.639	0.561599	39.07	1.92463	0.0504905	1.49236	162.92	3.09558	217.635	34.1841	162.92	3.09558
CSP5_27	332.439	0.505996	40.2199	2.08453	0.0511163	1.81095	158.319	3.25919	246.079	41.1775	158.319	3.25919
CSP5_26	464.803	0.436179	39.3318	2.45698	0.0492403	2.64222	161.85	3.92592	159.291	60.6777	161.85	3.92592
CSP5_24	261.56	0.734746	39.0412	2.17114	0.0502913	1.625	163.039	3.49448	208.48	37.2489	163.039	3.49448
CSP5_23	426.964	0.545056	39.264	2.22878	0.0503964	2.24104	162.125	3.56738	213.316	51.1054	162.125	3.56738
CSP5_22	710.915	0.578142	38.7153	2.10343	0.0479593	1.23754	164.394	3.41329	97.2514	29.0254	164.394	3.41329
CSP5_21	1000.56	0.697513	39.5573	2.05794	0.0497653	1.18857	160.938	3.27018	184.046	27.45	160.938	3.27018
CSP5_20	347.627	0.484843	38.9659	2.60345	0.0535185	1.87154	163.35	4.19794	350.841	41.7532	163.35	4.19794
CSP5_19	895.966	0.771965	38.0866	2.12128	0.0489927	2.14296	167.073	3.49761	147.492	49.483	167.073	3.49761
CSP5_18	696.655	0.55519	38.5228	1.96315	0.049266	1.91332	165.205	3.20123	160.515	44.1492	165.205	3.20123
CSP5_17	495.58	0.716145	38.6082	2.00951	0.0500362	2.06087	164.844	3.26974	196.675	47.1969	164.844	3.26974
CSP5_16	764.979	0.565535	38.0967	1.98453	0.0496802	1.86699	167.029	3.27133	180.058	42.9431	167.029	3.27133
CSP5_15	849.524	0.717886	38.2931	2.01685	0.0487578	1.92186	166.183	3.30799	136.215	44.5316	166.183	3.30799
CSP5_14	713.25	0.584431	38.7917	2.09652	0.0490703	2.04611	164.074	3.39555	151.2	47.2476	164.074	3.39555
CSP5_12	715.29	0.501509	38.9574	1.9443	0.0486673	2.37894	163.385	3.13602	131.829	55.011	163.385	3.13602
CSP5_11	659.867	0.483839	39.0221	1.73329	0.049643	2.00966	163.118	2.79122	178.31	46.1949	163.118	2.79122
CSP5_10	506.914	0.735298	39.1497	1.6004	0.048867	1.99648	162.593	2.56908	141.454	46.2079	162.593	2.56908
CSP5_9	754.994	0.555899	38.9033	1.91849	0.0482704	2.04157	163.61	3.09859	112.526	47.5025	163.61	3.09859
CSP5_8	540.284	0.595278	41.7104	1.89414	0.0499473	2.94442	152.728	2.85825	192.541	67.0701	152.728	2.85825
CSP5_7	841.336	0.533214	39.3052	1.75842	0.0503789	2.2256	161.958	2.8118	212.511	50.766	161.958	2.8118
CSP5_6	370.129	0.685049	38.6418	1.72398	0.0481265	1.64672	164.703	2.80287	105.513	38.4404	164.703	2.80287
CSP5_5	398.166	0.545658	38.197	1.7168	0.049795	1.61688	166.596	2.82286	185.433	37.22	166.596	2.82286
CSP5_4	211.457	0.709485	38.0586	1.82404	0.0494537	2.05696	167.194	3.00979	169.396	47.3427	167.194	3.00979
CSP5_3	444.992	0.55243	37.4789	1.75053	0.0489091	1.6146	169.747	2.93202	143.476	37.4523	169.747	2.93202
CSP5_1	419.477	0.554743	37.3067	2.01339	0.0522633	1.78742	170.52	3.38732	296.945	40.2814	170.52	3.38732
Ibagué batholith
CI15
CI15_22	2136.98	0.535912	42.4343	1.72856	0.0489433	0.812508	150.153	2.56498	145.122	18.9488	150.153	2.56498
CI15_21	516.443	0.509404	43.4689	1.68721	0.0481655	1.27968	146.619	2.44539	107.426	29.9432	146.619	2.44539
CI15_20	147.959	0.746836	44.0406	2.10252	0.0477771	2.03645	144.737	3.00852	88.2459	47.5814	144.737	3.00852
CI15_19	161.144	0.637844	42.8788	2.22611	0.0467193	2.1851	148.614	3.26964	34.9693	51.4437	148.614	3.26964
CI15_18	155.088	0.633783	44.8308	1.95108	0.0513092	1.94295	142.214	2.74375	254.743	44.0699	142.214	2.74375
CI15_16	115.682	0.674681	42.8943	2.02378	0.0502238	2.27771	148.561	2.97148	205.363	52.003	148.561	2.97148
CI15_15	301.973	0.524157	43.5441	1.79822	0.0491448	1.67978	146.369	2.60186	154.745	38.8681	146.369	2.60186
CI15_14	167.695	0.948814	43.931	2.03464	0.0485546	1.8497	145.094	2.91851	126.381	42.9717	145.094	2.91851
CI15_12	165.998	0.700858	44.5833	2.00808	0.050355	2.06632	142.995	2.83921	211.415	47.1944	142.995	2.83921
CI15_11	221.849	0.685226	43.7421	1.95922	0.0503953	1.64047	145.714	2.82221	213.265	37.5669	145.714	2.82221
CI15_10	188.662	0.554667	43.5245	2.24913	0.0464833	1.87913	146.434	3.25555	22.4602	44.7894	146.434	3.25555
CI15_9	357.225	0.710292	43.676	2.07538	0.0470566	1.32357	145.932	2.99393	52.0987	31.2942	145.932	2.99393
CI15_8	153.382	0.873601	43.4077	2.16214	0.048322	2.22277	146.824	3.13789	115.061	51.6108	146.824	3.13789
CI15_6	84.045	0.652266	44.9591	2.29609	0.0436291	2.96593	141.813	3.21978	1.21749e-11	1.14985e-11	141.813	3.21978
CI15_5	301.892	0.597254	44.3935	1.92377	0.0487639	1.53104	143.6	2.7314	136.495	35.5824	143.6	2.7314
CI15_4	166.774	0.637115	45.806	2.19192	0.04867	2.11032	139.219	3.01814	131.962	48.8866	139.219	3.01814
CI15_3	164.459	0.987046	43.5402	2.9323	0.0490583	2.47122	146.382	4.2426	150.617	56.9081	146.382	4.2426
CI15_2	173.447	0.610299	44.1761	2.02862	0.0502099	1.85125	144.298	2.8941	204.722	42.3969	144.298	2.8941
CI15_1	190.383	0.721179	44.0287	2.21733	0.0456753	2.05321	144.776	3.17359	5.6816e-11	29.3499	144.776	3.17359
CI13
CI13_36	108.257	0.804418	44.4409	2.66476	0.0502112	2.42585	143.448	3.77921	204.784	55.3336	143.448	3.77921
CI13_35	146.755	0.648543	44.7715	2.38702	0.0503715	2.0225	142.4	3.36098	212.175	46.2012	142.4	3.36098
CI13_34	509.426	0.301462	45.159	2.35961	0.0486234	1.63711	141.192	3.29451	129.726	38.0539	141.192	3.29451
CI13_33	140.964	0.61218	44.9348	2.47222	0.0499666	2.80533	141.889	3.46855	193.439	63.9524	141.889	3.46855
CI13_31	217.161	0.975848	45.3431	2.43471	0.0498124	2.17493	140.625	3.38584	186.251	49.8631	140.625	3.38584
CI13_30	119.11	0.677793	44.465	2.52295	0.0507605	2.13121	143.371	3.57626	229.969	48.4919	143.371	3.57626
CI13_29	122.155	0.665549	44.3647	2.38662	0.0474684	2.17706	143.692	3.39054	72.8577	50.9616	143.692	3.39054
CI13_28	118.75	0.667574	45.7141	2.39589	0.0450513	2.616	139.496	3.30542	2.79571e-11	6.71447	139.496	3.30542
CI13_27	147.569	0.746669	44.8097	2.57372	0.0472643	2.25888	142.28	3.62077	62.6018	52.9475	142.28	3.62077
CI13_24	164.287	0.51931	44.6954	2.47735	0.049141	2.15502	142.64	3.49394	154.562	49.7005	142.64	3.49394
CI13_22	164.58	0.49767	43.8314	2.5723	0.0511812	2.29974	145.42	3.69771	248.997	52.0874	145.42	3.69771
CI13_21	109.846	0.6657	45.6057	2.47239	0.0523733	2.26584	139.824	3.41886	301.742	50.8518	139.824	3.41886
CI13_20	123.831	0.664717	43.3787	2.47817	0.0475072	2.99268	146.921	3.59876	74.7995	69.6287	146.921	3.59876
CI13_19	126.56	0.647727	44.1611	1.83828	0.0464901	2.37875	144.347	2.62348	23.153	56.0817	144.347	2.62348
CI13_18	241.694	0.692832	45.4578	2.8469	0.0478485	3.66513	140.274	3.9491	91.7842	84.6103	140.274	3.9491
CI13_17	126.626	0.664811	43.9282	1.81565	0.046841	2.33489	145.103	2.60462	41.1321	54.9163	145.103	2.60462
CI13_14	117.838	0.625978	44.705	1.82508	0.0500899	2.45892	142.61	2.57365	199.166	56.1324	142.61	2.57365
CI13_11	234.017	0.81829	43.5415	1.79842	0.0480048	1.74541	146.378	2.6023	99.5033	40.7803	146.378	2.6023
CI13_9	167.858	0.612461	44.7937	1.54066	0.0490962	2.94944	142.33	2.16843	152.429	67.6726	142.33	2.16843
CI13_8	211.786	0.602234	44.1219	1.55838	0.0480354	2.74943	144.474	2.22603	101.014	63.769	144.474	2.22603
CI13_7	215.976	0.955193	43.8492	1.34905	0.0493253	2.63569	145.362	1.93877	163.323	60.4857	145.362	1.93877
CI13_6	145.211	0.66521	45.0986	1.60297	0.0485188	2.93805	141.379	2.2412	124.645	67.7595	141.379	2.2412
CI13_5	166.179	0.681417	43.2626	1.43151	0.0479054	2.84832	147.31	2.08452	94.6003	66.0948	147.31	2.08452
CI13_4	402.35	1.07267	44.3213	1.32155	0.0489526	2.45353	143.831	1.87947	145.564	56.5598	143.831	1.87947
CI13_3	119.018	0.761208	45.0228	1.62479	0.0503375	2.92105	141.614	2.27545	210.606	66.3323	141.614	2.27545
CI13_2	106.81	0.649989	43.1757	1.63487	0.0463689	3.06563	147.604	2.38527	17.5352	71.3782	147.604	2.38527
CI13_1	186.265	0.767578	43.7819	1.54634	0.0473263	2.7749	145.583	2.22559	65.7222	64.7687	145.583	2.22559
CI11
CI11_30	257.89	0.555067	42.6934	1.28055	0.0484878	2.47894	149.252	1.88902	123.136	57.3706	149.252	1.88902
CI11_29	269.56	0.821337	41.3044	1.25051	0.0497691	2.79608	154.212	1.90526	184.223	63.8526	154.212	1.90526
CI11_28	181.016	0.81681	42.6907	1.33647	0.0482045	2.62309	149.261	1.97162	109.319	60.7994	149.261	1.97162
CI11_27	141.894	0.781211	41.2458	1.35605	0.0474626	2.82188	154.428	2.06891	72.5668	65.7607	154.428	2.06891
CI11_26	197.314	0.953809	42.6692	1.2373	0.0489188	2.53279	149.336	1.82624	143.943	58.372	149.336	1.82624
CI11_25	180.042	0.886581	42.7081	1.36515	0.0480949	2.8372	149.201	2.01312	103.941	65.7287	149.201	2.01312
CI11_24	197.305	1.03503	41.6114	1.18646	0.0490071	2.51477	153.087	1.79467	148.17	57.9191	153.087	1.79467
CI11_23	268.566	0.816379	43.9608	1.15395	0.0467534	2.49076	144.997	1.65431	36.3927	58.8164	144.997	1.65431
CI11_22	506.266	0.545382	41.9791	1.02433	0.050298	2.29643	151.762	1.53621	208.79	52.3911	151.762	1.53621
CI11_21	216.821	1.0006	40.6687	1.24956	0.0482484	2.61833	156.593	1.93286	111.467	60.6672	156.593	1.93286
CI11_20	219.149	0.551591	42.004	1.18269	0.0477567	2.57854	151.673	1.77264	87.235	60.0293	151.673	1.77264
CI11_19	312.62	0.869992	41.9053	1.07896	0.050835	2.55706	152.026	1.62091	233.355	57.975	152.026	1.62091
CI11_18	237.726	0.969333	41.9365	1.14065	0.0498661	2.69701	151.914	1.71232	188.756	61.5818	151.914	1.71232
CI11_17	156.77	0.89319	41.4632	1.33988	0.0506758	2.88565	153.628	2.03378	226.111	65.362	153.628	2.03378
CI11_16	209.036	1.01726	41.9476	1.24973	0.0465927	2.71998	151.875	1.87557	28.2011	64.1481	151.875	1.87557
CI11_15	116.084	0.652155	42.2201	1.46071	0.0489876	3.06821	150.906	2.17833	147.24	70.4063	150.906	2.17833
CI11_14	233.563	1.00519	42.2357	1.24055	0.0479719	2.72222	150.851	1.84938	97.8818	63.1861	150.851	1.84938
CI11_13	202.703	0.673138	41.8077	1.23675	0.0474625	2.75815	152.377	1.86215	72.5601	64.3041	152.377	1.86215
CI11_12	256.817	0.91973	41.7427	1.83642	0.0488483	2.193	152.611	2.76908	140.569	50.6801	152.611	2.76908
CI11_11	182.108	0.796298	42.6828	1.90329	0.0488501	2.2983	149.289	2.80813	140.655	53.0742	149.289	2.80813
CI11_10	296.307	0.935856	40.6772	1.8072	0.0500355	2.18418	156.561	2.79467	196.642	49.978	156.561	2.79467
CI11_9	215.024	1.00346	41.8927	1.9417	0.0503266	2.34638	152.071	2.91756	210.107	53.4991	152.071	2.91756
CI11_8	278.83	0.821019	41.241	1.89642	0.0489001	2.2358	154.446	2.89348	143.056	51.6319	154.446	2.89348
CI11_7	464.907	0.725017	39.3694	1.78301	0.0493144	2.02021	161.697	2.84658	162.812	46.5611	161.697	2.84658
CI11_6	213.246	0.69283	41.3604	2.4002	0.0476207	2.87516	154.005	3.65159	80.4645	66.8793	154.005	3.65159
CI11_5	294.016	0.883326	41.2443	2.36547	0.0478858	2.81041	154.434	3.60866	93.6332	65.244	154.434	3.60866
CI11_4	189.555	0.921553	40.8966	2.34427	0.0481297	2.98011	155.731	3.60599	105.651	68.949	155.731	3.60599
CI11_3	319.846	0.856269	41.1634	2.41583	0.0464862	2.76271	154.733	3.69253	21.9522	65.9456	154.733	3.69253
CI11_2	490.979	0.521238	41.1598	2.25788	0.0488756	2.70892	154.747	3.45147	141.87	62.3781	154.747	3.45147
CI11_1	307.091	0.696765	40.8326	2.19713	0.047489	2.90805	155.972	3.3849	73.8899	67.7112	155.972	3.3849
CI12
CI2_30	109.515	0.648678	44.3939	2.49839	0.0489053	3.19891	143.598	3.547	143.293	73.3916	143.598	3.547
CI2_29	117.919	0.785596	44.6176	2.49747	0.0493163	3.19239	142.886	3.52831	162.898	72.9847	142.886	3.52831
CI2_28	348.283	0.810434	45.3409	2.22856	0.048948	2.72984	140.631	3.09937	145.342	62.8107	140.631	3.09937
CI2_27	1142.46	0.590582	41.8945	2.22544	0.0476174	2.47508	152.065	3.34364	80.322	57.7182	152.065	3.34364
CI2_26	379.218	0.537777	43.8786	2.25332	0.049329	2.6752	145.266	3.23588	163.496	61.3736	145.266	3.23588
CI2_25	329.118	0.482497	44.5879	2.29908	0.0484386	2.65084	142.98	3.25022	120.745	61.3012	142.98	3.25022
CI2_24	461.781	0.736125	44.4503	2.1926	0.0478668	2.61295	143.418	3.10911	92.6955	60.7479	143.418	3.10911
CI2_23	422.927	0.605257	43.0656	2.3415	0.0480708	2.63359	147.977	3.4245	102.759	61.1091	147.977	3.4245
CI2_22	434.849	0.714962	46.1419	2.38799	0.0491761	2.68649	138.216	3.26463	156.236	61.7094	138.216	3.26463
CI2_21	292.51	0.573274	44.1386	2.40476	0.0562982	2.89984	144.419	3.43341	464.148	62.9962	144.419	3.43341
CI2_20	384.843	0.524059	43.9902	1.9203	0.0487052	2.08169	144.901	2.75091	133.663	48.2179	144.901	2.75091
CI2_19	574.094	1.1228	44.0645	2.08669	0.0479637	1.97037	144.66	2.9843	97.4774	45.9805	144.66	2.9843
CI2_18	293.479	0.924433	45.9181	2.06628	0.0468209	2.23621	138.882	2.83838	40.0433	52.7014	138.882	2.83838
CI2_16	280.813	0.625471	44.0558	1.96701	0.0494896	2.22112	144.688	2.81371	171.092	51.047	144.688	2.81371
CI2_15	667.635	1.07851	43.7082	1.9217	0.0479184	1.94704	145.826	2.77028	95.2399	45.4623	145.826	2.77028
CI2_14	318.771	0.548675	44.6102	2.08823	0.048012	2.1029	142.909	2.95077	99.8582	49.0059	142.909	2.95077
CI2_12	161.134	0.671481	45.6912	2.04544	0.0470603	2.57058	139.565	2.82341	52.279	60.2463	139.565	2.82341
CI2_10	779.024	0.909688	44.4179	2.09793	0.0475966	1.86636	143.521	2.97703	79.2655	43.7329	143.521	2.97703
CI2_9	401.741	0.626291	45.6198	1.46156	0.048994	1.89793	139.781	2.02068	147.543	43.9063	139.781	2.02068
CI2_8	343.788	0.728357	44.922	1.48315	0.0490089	1.92863	141.928	2.08167	148.257	44.6012	141.928	2.08167
CI2_6	130.156	0.483042	43.0011	1.80225	0.0461878	2.49968	148.196	2.63986	8.8976	57.6427	148.196	2.63986
CI2_5	410.371	0.58399	42.9941	1.36357	0.0484089	1.8745	148.22	1.99771	119.299	43.597	148.22	1.99771
CI2_4	345.476	0.633959	44.5765	1.38421	0.0491272	1.91928	143.017	1.95755	153.907	44.342	143.017	1.95755
CI9B
CI9B_31	130.892	1.00074	44.1963	1.45802	0.0471865	1.70327	144.233	2.07926	58.7136	40.0736	144.233	2.07926
CI9B_30	119.835	0.903597	44.9377	1.51293	0.0475093	1.92286	141.88	2.12275	74.9195	45.061	141.88	2.12275
CI9B_29	94.3392	0.847355	45.8116	1.61162	0.0487454	2.00729	139.202	2.21898	135.604	46.502	139.202	2.21898
CI9B_28	69.3431	0.6741	46.2748	1.87445	0.0535445	2.50669	137.823	2.5555	351.94	55.6701	137.823	2.5555
CI9B_27	99.1977	0.736584	44.8264	1.45159	0.0498003	2.04753	142.228	2.04163	185.682	46.9899	142.228	2.04163
CI9B_26	119.583	0.908319	44.5386	1.59305	0.0496762	1.76562	143.137	2.25472	179.873	40.643	143.137	2.25472
CI9B_25	116.564	0.923462	45.3198	1.49303	0.0501966	1.99684	140.696	2.07755	204.108	45.6902	140.696	2.07755
CI9B_23	168.664	0.906643	44.9267	1.54705	0.0487364	1.56684	141.914	2.17112	135.158	36.4214	141.914	2.17112
CI9B_22	117.805	0.750263	45.1533	1.51227	0.0509439	1.83477	141.209	2.1119	238.292	41.7705	141.209	2.1119
CI9B_20	169.782	0.917164	46.4334	1.45233	0.048483	1.51909	137.358	1.97348	122.887	35.4097	137.358	1.97348
CI9B_19	138.497	0.597491	45.0496	1.77101	0.0493542	1.95341	141.531	2.47873	164.688	45.0328	141.531	2.47873
CI9B_18	160.194	0.970628	45.464	1.54803	0.0487553	1.69071	140.255	2.14738	136.083	39.2517	140.255	2.14738
CI9B_17	101.842	0.757654	44.1771	1.73659	0.0489478	1.90216	144.295	2.4775	145.334	44.0206	144.295	2.4775
CI9B_16	119.716	0.803197	45.9121	1.59255	0.0497526	1.80293	138.9	2.18802	183.452	41.464	138.9	2.18802
CI9B_15	137.38	0.467098	44.3215	1.56907	0.0486242	1.78778	143.83	2.23141	129.751	41.5248	143.83	2.23141
CI9B_14	172.875	0.957211	44.5345	1.31325	0.0487571	1.62911	143.15	1.85892	136.166	37.8373	143.15	1.85892
CI9B_13	140.277	0.810645	44.1054	1.60832	0.047513	1.67	144.527	2.29818	75.1205	39.1903	144.527	2.29818
CI9B_12	126.098	0.95683	44.8016	2.15153	0.0485629	1.72719	142.306	3.02749	126.776	40.1605	142.306	3.02749
CI9B_11	144.758	0.87914	44.8823	2.05639	0.0500483	1.62845	142.053	2.88856	197.237	37.4033	142.053	2.88856
CI9B_10	107.817	0.702323	44.9355	2.17706	0.0503602	1.79018	141.886	3.05449	211.653	40.9643	141.886	3.05449
CI9B_9	123.758	0.92233	45.6922	2.32673	0.0506453	2.32795	139.562	3.21153	224.72	52.9464	139.562	3.21153
CI9B_8	128.466	0.931731	45.3872	2.03969	0.0478308	1.67041	140.489	2.83393	90.8825	39.131	140.489	2.83393
CI9B_7	99.2079	0.633843	44.8721	2.13412	0.0497393	2.02286	142.085	2.99839	182.831	46.4559	142.085	2.99839
CI9B_6	126.644	0.968452	44.4451	1.91657	0.0483893	1.70709	143.435	2.7181	118.345	39.7573	143.435	2.7181
CI9B_5	123.164	0.907585	44.0302	1.89941	0.0513276	1.83043	144.771	2.71857	255.57	41.5439	144.771	2.71857
CI9B_4	92.5673	0.71029	44.2055	2.13782	0.0498128	2.30836	144.203	3.04787	186.269	52.8739	144.203	3.04787
CI9B_3	100.71	0.709423	44.3553	2.0991	0.0496194	2.05668	143.722	2.9828	177.204	47.2696	143.722	2.9828
CI9B_2	103.893	0.628206	45.8237	2.20935	0.0477701	2.20702	139.166	3.04098	87.901	51.5083	139.166	3.04098
CI9B_1	119.042	0.62795	44.8596	2.06008	0.0460547	2.18896	142.124	2.89517	1.80923	50.61	142.124	2.89517
GCC6
GCC6-1	192.932	0.568573	40.4334	0.0193	0.0475706	0.047627	157.493	3.00279	77.9424	113.18	157.493	3.00279
GCC6-2	166.513	0.59897	39.6911	0.0071	0.0473932	0.0850332	160.402	1.12481	69.0792	202.621	160.402	1.12481
GCC6-3	131.128	0.425858	40.1839	0.00500008	0.0488084	0.0853902	158.459	0.782649	138.653	200.836	158.459	0.782649
GCC6-4	132.63	0.451957	39.4805	0.0116	0.048993	0.0570569	161.247	1.84727	147.518	133.877	161.247	1.84727
GCC6-5	282.094	1.21577	40.2992	0.0092	0.0492308	0.0555434	158.012	1.43603	158.862	130.047	158.012	1.43603
GCC6-6	234.709	0.382126	40.3189	0.0154	0.0483785	0.0293913	157.935	2.40265	117.827	69.3086	157.935	2.40265
GCC6-7	468.805	0.694719	40.2643	0.0206	0.0505997	0.0144704	158.147	3.21819	222.616	33.4672	158.147	3.21819
GCC6-8	219.609	0.481154	40.3485	0.005	0.0483488	0.0274869	157.821	0.779522	116.372	64.8273	157.821	0.779522
GCC6-9	165.434	0.443948	40.9459	0.0339	0.0485992	0.0437006	155.545	5.20988	128.562	102.869	155.545	5.20988
GCC6-10	119.594	0.433752	39.9571	0.0188	0.0449213	0.0951454	159.348	2.95901	-59.8973	232.397	159.348	2.95901
GCC6-11	187.354	0.536132	40.0941	0.028	0.0465571	0.0582781	158.81	4.39235	26.5567	139.847	158.81	4.39235
GCC6-12	214.322	0.617481	40.4057	0.014	0.0462811	0.0617858	157.6	2.17965	12.2828	148.679	157.6	2.17965
GCC6-13	242.469	0.400353	39.716	0.0069	0.0476708	0.0347927	160.303	1.09245	82.9392	82.5732	160.303	1.09245
GCC6-14	198.062	0.529242	39.1342	0.0123	0.0489786	0.0502022	162.656	1.97564	146.831	117.781	162.656	1.97564
GCC6-15	289.275	1.0796	40.375	0.00800001	0.0494652	0.0694082	157.718	1.24644	169.916	162.234	157.718	1.24644
GCC6-16	266.516	0.384448	40.3824	0.005	0.0476947	0.0417717	157.69	0.778884	84.1309	99.1175	157.69	0.778884
GCC6-17	807.927	0.469838	40.0959	0.01	0.0535322	0.0269747	158.803	1.56863	351.401	60.9693	158.803	1.56863
GCC6-18	184.199	0.448405	40.6472	0.016	0.0499862	0.174636	156.675	2.47658	194.375	408.645	156.675	2.47658
GCC6-19	276.327	0.440023	40.6484	0.005	0.048595	0.0342206	156.67	0.77391	128.357	80.5425	156.67	0.77391
GCC6-20	210.303	0.542925	39.5957	0.00500001	0.0477749	0.0418195	160.784	0.793979	88.1575	99.1569	160.784	0.793979
GCC6-21	195.178	0.456472	41.2195	0.0253001	0.0586269	0.113824	154.525	3.86302	553.267	249.131	154.525	3.86302
GCC6-22	798.096	0.534428	40.4357	0.017	0.0531384	0.165072	157.484	2.6448	334.715	376.403	157.484	2.6448
GCC6-23	226.588	0.491799	39.6641	0.005	0.0472806	0.0445762	160.51	0.792642	63.4482	106.191	160.51	0.792642
GCC6-24	228.878	0.718758	40.3483	0.0167	0.047954	0.0569929	157.821	2.60362	96.9794	134.985	157.821	2.60362
GCC6-25	137.754	0.449774	40.581	0.0198	0.0474067	0.0494508	156.927	3.06965	69.7882	117.676	156.927	3.06965
GCC6-26	148.259	0.501723	39.446	0.0132	0.0471232	0.0674562	161.386	2.10386	55.45	161.035	161.386	2.10386
GCC6-27	376.128	0.436169	40.2617	0.0224	0.0489178	0.0183325	158.157	3.49961	143.907	43.0035	158.157	3.49961
GCC6-28	394.048	0.450845	40.2531	0.0058	0.0480539	0.0288906	158.19	0.906337	101.898	68.3051	158.19	0.906337
GCC6-29	219.994	0.538495	39.8073	0.0082	0.0476439	0.0401529	159.94	1.29537	81.6019	95.318	159.94	1.29537
GCC6-30	149.509	0.545146	39.5993	0.00990002	0.0457427	0.0851921	160.77	1.57194	-15.9013	206.285	160.77	1.57194
GCC6-31	204.416	0.632902	40.4521	0.0179	0.0472946	0.0467508	157.421	2.78372	64.133	111.362	157.421	2.78372
GCC6-32	282.441	0.481379	40.2071	0.0111	0.0492058	0.0358182	158.369	1.73648	157.642	83.8404	158.369	1.73648
GCC6-33	230.916	0.499417	39.843	0.0053	0.0491893	0.0232976	159.798	0.83652	156.851	54.52	159.798	0.83652
GCC6-35	217.54	0.464391	39.9522	0.0079	0.0519457	0.0819069	159.367	1.24356	283.04	187.657	159.367	1.24356
GCC6-36	239.308	0.575079	39.4278	0.0050001	0.0609919	0.154241	161.46	0.797292	638.968	333.573	161.46	0.797292
GCC6-37	330.193	0.561258	39.0102	0.0054	0.0475671	0.0441955	163.167	0.870044	77.7721	105	163.167	0.870044
GCC6-38	278.346	0.516397	40.5927	0.0073	0.0484454	0.0350788	156.883	1.13142	121.098	82.6761	156.883	1.13142
GCC6-39	262.396	0.463453	39.5214	0.023	0.0480829	0.0455842	161.083	3.65899	103.373	107.787	161.083	3.65899
GCC6-40	202.447	0.531414	39.9267	0.0193	0.0486174	0.0280532	159.467	3.03996	129.397	66.0211	159.467	3.03996
GCC6-41	124.453	0.426876	39.6998	0.0121001	0.0481328	0.179568	160.368	1.91652	105.778	427.249	160.368	1.91652
GCC6-42	109.53	0.383084	40.4227	0.0107005	0.0573029	0.30308	157.535	1.66526	503.218	681.448	157.535	1.66526
GCC6-43	277.804	0.57214	40.6898	0.0091	0.0486261	0.0320515	156.513	1.40712	129.863	75.4063	156.513	1.40712
GCC6-44	126.137	0.443834	40.264	0.0113	0.0543032	0.0746946	158.148	1.76533	383.625	168.048	158.148	1.76533
GCC6-45	744.129	0.272476	39.9176	0.0377	0.0500023	0.0144492	159.503	5.9395	195.121	33.5977	159.503	5.9395
GCC6-46	255.739	0.568468	40.1053	0.0054	0.0511616	0.042618	158.766	0.846865	248.097	98.1317	158.766	0.846865
GCC6-47	225.175	0.514123	40.2533	0.0086	0.0480892	0.0392657	158.189	1.34387	103.657	92.8382	158.189	1.34387
GCC6-48	173.347	0.528709	40.7175	0.0188	0.0457085	0.0784484	156.408	2.90508	-17.7109	189.955	156.408	2.90508
Mariquita stock
CM7
CM7_39	1957.9	0.365656	48.7063	1.12758	0.0494015	0.499558	131.013	1.4622	166.924	11.6338	131.013	1.4622
CM7_38	2484.38	0.422916	49.2313	1.05589	0.0496152	0.521543	129.629	1.35493	177	12.1205	129.629	1.35493
CM7_37	782.687	0.280174	50.0578	1.26751	0.0496356	0.919504	127.51	1.60013	177.957	21.3027	127.51	1.60013
CM7_36	775.851	0.332798	49.3158	1.20563	0.0534433	0.730308	129.409	1.54446	347.663	16.431	129.409	1.54446
CM7_35	1685.97	0.37389	49.7507	1.27439	0.0509622	0.956961	128.289	1.61854	239.117	21.9176	128.289	1.61854
CM7_33	1346.32	0.513123	46.9854	1.02426	0.0492077	0.560431	135.761	1.37586	157.73	13.0682	135.761	1.37586
CM7_31	4193.98	0.479908	48.2217	1.00736	0.0489507	0.408347	132.316	1.31918	145.46	9.55749	132.316	1.31918
CM7_30	756.067	0.230718	48.7629	1.53982	0.0491478	0.835918	130.862	1.99442	154.89	19.4574	130.862	1.99442
CM7_27	442.212	0.376364	49.3712	1.7148	0.0528156	1.58606	129.266	2.19419	320.884	35.6417	129.266	2.19419
CM7_26	1751.13	0.397953	49.997	2.21473	0.0483966	0.989177	127.664	2.79898	118.72	23.1506	127.664	2.79898
CM7_25	347.964	0.242872	50.2902	1.65479	0.0497803	1.17438	126.926	2.07948	184.747	27.1213	126.926	2.07948
CM7_24	4792.66	0.389999	47.2719	1.48507	0.0505667	0.597988	134.946	1.98291	221.126	13.7751	134.946	1.98291
CM7_21	600.788	0.340017	49.2669	1.5998	0.0687577	1.52042	129.536	2.05131	891.481	31.0873	129.536	2.05131
CM7_20	1440.73	0.464023	49.1635	1.41636	0.0513418	0.870512	129.806	1.81988	256.204	19.8879	129.806	1.81988
CM7_18	2040.72	0.399237	48.6781	1.49023	0.0489798	0.773897	131.088	1.93348	146.864	18.0484	131.088	1.93348
CM7_17	1761.81	0.355783	49.0907	1.62685	0.049822	0.771716	129.997	2.09333	186.696	17.8667	129.997	2.09333
CM7_16	1729.19	0.318622	49.0685	1.50159	0.0566264	0.831427	130.055	1.93304	477.013	18.2766	130.055	1.93304
CM7_15	444.472	0.289396	48.8587	1.64606	0.0476397	1.15043	130.608	2.1279	81.3868	27.1041	130.608	2.1279
CM7_14	1929.71	0.472835	48.0568	1.51949	0.0504776	0.803108	132.765	1.99641	217.044	18.4869	132.765	1.99641
CM7_13	1290.52	0.420099	47.6462	1.46196	0.0494029	0.872127	133.897	1.93705	166.995	20.2499	133.897	1.93705
CM7_12	1128.17	0.395322	47.2663	1.47724	0.0488845	0.855166	134.962	1.97269	142.292	19.9491	134.962	1.97269
CM7_11	404.543	0.256903	48.3856	1.38185	0.0520487	1.1144	131.872	1.80351	287.55	25.274	131.872	1.80351
CM7_10	746.863	0.267762	48.4418	1.15559	0.0509188	0.931656	131.721	1.50652	237.157	21.3488	131.721	1.50652
CM7_9	595.705	0.284781	49.4245	1.2621	0.0517533	1.04301	129.128	1.61331	274.524	23.7219	129.128	1.61331
CM7_7	779.751	0.404518	50.1491	1.46225	0.0501103	1.2886	127.28	1.84264	200.115	29.6524	127.28	1.84264
CM7_6	1483.67	0.451743	48.2665	1.17418	0.0492326	0.800657	132.194	1.5362	158.926	18.627	132.194	1.5362
CM7_4	702.041	0.252767	49.817	1.2933	0.0482696	0.97633	128.12	1.64041	112.518	22.8749	128.12	1.64041
CM7_3	972.012	0.369881	48.1658	1.24793	0.0491936	0.865739	132.467	1.63603	157.068	20.1386	132.467	1.63603
CM7_2	828.771	0.329274	48.6212	1.27087	0.0485405	0.911515	131.239	1.65081	125.701	21.3171	131.239	1.65081
CM7_1	1127.23	0.333353	49.3615	1.08174	0.0481128	0.95867	129.291	1.3845	104.839	22.493	129.291	1.3845
CM19
CM19_39	2190.18	0.428069	49.5424	1.07288	0.0502227	0.775769	128.823	1.36825	205.316	17.8984	128.823	1.36825
CM19_38	985.483	0.400184	48.1666	1.10396	0.0840251	0.862552	132.465	1.44727	1293.13	16.6872	132.465	1.44727
CM19_37	299.752	0.357999	49.7347	1.34715	0.0489037	1.28914	128.33	1.71148	143.222	29.9688	128.33	1.71148
CM19_36	758.867	0.260303	49.2012	1.1768	0.0493162	1.14306	129.708	1.51097	162.895	26.5068	129.708	1.51097
CM19_35	1131.73	0.498499	50.3538	1.26294	0.0495755	0.966038	126.768	1.58517	175.138	22.3801	126.768	1.58517
CM19_34	800.351	0.461585	49.0101	1.00858	0.0485219	0.912732	130.209	1.29995	124.806	21.3364	130.209	1.29995
CM19_33	502.456	0.334483	49.2558	1.27795	0.0512314	1.22283	129.565	1.63904	251.256	27.893	129.565	1.63904
CM19_31	1903.45	0.478859	48.5956	1.05317	0.0500349	0.740869	131.308	1.36876	196.616	17.125	131.308	1.36876
CM19_30	937.942	0.330053	47.9939	1.17839	0.0492333	0.84163	132.937	1.5503	158.957	19.5738	132.937	1.5503
CM19_29	123.432	0.244036	50.7373	1.87379	0.0539869	2.14683	125.819	2.3343	370.501	47.6404	125.819	2.3343
CM19_28	498.038	0.33395	49.0999	1.4457	0.0512124	1.27089	129.973	1.85993	250.401	28.984	129.973	1.85993
CM19_27	117.77	0.222855	50.3777	1.6196	0.0491604	1.97985	126.708	2.03181	155.486	45.7087	126.708	2.03181
CM19_26	728.366	0.323603	49.4722	1.17136	0.0484284	1.16076	129.004	1.49592	120.249	27.1261	129.004	1.49592
CM19_25	614.389	0.331049	50.3797	1.34072	0.0477508	1.09803	126.703	1.68193	86.9376	25.8187	126.703	1.68193
CM19_24	836.777	0.261524	49.5187	1.09483	0.049242	0.95093	128.884	1.3969	159.371	22.0974	128.884	1.3969
CM19_23	1462.39	0.267954	47.1774	1.01678	0.0512702	0.870949	135.214	1.36036	252.995	19.9093	135.214	1.36036
CM19_22	3281.34	0.302779	47.5025	0.99405	0.0526274	0.593144	134.298	1.32104	312.765	13.4407	134.298	1.32104
CM19_21	253.448	0.326078	48.3453	1.3418	0.0501857	1.33467	131.981	1.75267	203.601	30.6835	131.981	1.75267
CM19_20	359.804	0.302249	47.0525	1.2471	0.0495537	1.00234	135.569	1.67281	174.111	23.2231	135.569	1.67281
CM19_19	929.591	0.357783	46.5738	0.911308	0.0557841	0.868255	136.948	1.23473	443.784	19.1909	136.948	1.23473
CM19_18	513.079	0.311133	47.9307	1.1236	0.0484708	1.13708	133.111	1.48012	122.292	26.5844	133.111	1.48012
CM19_16	1148.86	0.568688	49.8803	0.953688	0.0567832	0.78008	127.959	1.20819	483.122	17.1359	127.959	1.20819
CM19_15	2620.94	0.42404	46.9901	1.04357	0.052231	0.645085	135.747	1.40166	295.537	14.6573	135.747	1.40166
CM19_14	703.746	0.273953	49.0214	1.45467	0.0504456	0.946855	130.179	1.87441	215.579	21.7799	130.179	1.87441
CM19_13	387.142	0.328381	48.143	1.21902	0.0491691	1.01517	132.53	1.59887	155.899	23.5986	132.53	1.59887
CM19_10	816.502	0.379283	47.8296	1.21509	0.0507181	1.00235	133.389	1.60395	228.04	22.9952	133.389	1.60395
CM19_8	335.696	0.380246	47.8737	1.24895	0.0534416	1.59338	133.268	1.64715	347.594	35.6361	133.268	1.64715
CM19_7	2727.65	0.575963	49.5454	1.14848	0.0488532	0.65836	128.816	1.46457	140.793	15.382	128.816	1.46457
CM19_6	286.029	0.333049	51.4727	1.40949	0.0490104	1.35027	124.038	1.73137	148.329	31.3522	124.038	1.73137
CM19_5	1042.14	0.310808	49.0677	1.11661	0.0487201	0.892951	130.057	1.43751	134.383	20.8531	130.057	1.43751
CM19_4	647.012	0.472544	51.303	1.24865	0.0501611	1.16747	124.445	1.53879	202.467	26.8764	124.445	1.53879
CM19_3	1105.87	0.67872	47.2468	1.14222	0.0477264	0.773473	135.017	1.52597	85.756	18.2184	135.017	1.52597
CM19_1	1991.01	0.402902	47.8249	1.12462	0.0483309	0.614527	133.402	1.48468	115.506	14.4249	133.402	1.48468
CM17B
CM17B_37	2171.26	0.254771	47.0211	1.75205	0.0490086	0.439564	135.659	2.35155	148.241	10.2732	135.659	2.35155
CM17B_36	1232.7	0.34012	49.7996	1.87948	0.0505193	0.695915	128.165	2.3846	218.956	16.026	128.165	2.3846
CM17B_33	919.749	0.502545	50.0738	1.79877	0.0474755	0.726921	127.47	2.26996	73.181	17.2118	127.47	2.26996
CM17B_32	330.066	0.235956	49.1056	2.18016	0.0485462	1.65811	129.958	2.80431	125.97	38.5768	129.958	2.80431
CM17B_30	252.932	0.269381	47.7453	1.83388	0.0469503	1.30377	133.622	2.42479	46.6502	30.9048	133.622	2.42479
CM17B_29	786.271	0.25089	47.4818	1.89207	0.0509898	0.937085	134.356	2.51531	240.371	21.4599	134.356	2.51531
CM17B_28	187.988	0.24579	47.5375	1.89961	0.0486094	1.53707	134.2	2.52243	129.033	35.7704	134.2	2.52243
CM17B_27	295.99	0.338329	47.7461	1.72631	0.047767	1.18735	133.62	2.28254	87.7423	27.916	133.62	2.28254
CM17B_26	269.041	0.26151	48.6602	1.7774	0.0495955	1.35335	131.135	2.30684	176.082	31.2649	131.135	2.30684
CM17B_25	1911	0.327928	48.7371	1.60356	0.0487771	0.565076	130.93	2.07803	137.132	13.2217	130.93	2.07803
CM17B_23	2630.53	0.315128	47.2785	1.4938	0.0490798	0.496094	134.928	1.99429	151.652	11.5793	134.928	1.99429
CM17B_22	666.972	0.43661	48.802	1.58352	0.0493426	0.857045	130.758	2.04939	164.144	19.9105	130.758	2.04939
CM17B_21	2493.31	0.467115	48.8482	1.62006	0.0494156	0.695386	130.636	2.09473	167.6	16.1631	130.636	2.09473
CM17B_20	1127	0.303843	47.8354	1.53256	0.04975	0.651472	133.373	2.0227	183.332	15.1042	133.373	2.0227
CM17B_19	1068.13	0.360685	48.1961	1.51558	0.0490679	0.703167	132.385	1.98563	151.08	16.3913	132.385	1.98563
CM17B_18	649.1	0.334283	45.8842	1.60231	0.0505817	0.79766	138.984	2.20274	221.813	18.3462	138.984	2.20274
CM17B_16	1208.59	0.330156	49.8175	1.56079	0.0484786	0.59304	128.119	1.97962	122.709	13.9005	128.119	1.97962
CM17B_15	955.698	0.259203	47.8946	1.5442	0.051377	0.729834	133.21	2.03559	257.782	16.6856	133.21	2.03559
CM17B_14	1537.43	0.357882	48.0569	1.41583	0.0490416	0.604951	132.765	1.86023	149.828	14.1168	132.765	1.86023
CM17B_13	1508.48	0.251214	48.7632	1.46449	0.0490902	0.714951	130.861	1.89684	152.148	16.663	130.861	1.89684
CM17B_12	2165.78	0.281784	49.745	1.52713	0.0488231	0.638175	128.304	1.93971	139.356	14.9166	128.304	1.93971
CM17B_11	1484.73	0.270999	49.2039	1.45515	0.0494742	0.71819	129.701	1.8682	170.368	16.6829	129.701	1.8682
CM17B_10	2301.31	0.328837	48.5444	1.43715	0.0524207	0.621408	131.445	1.86966	303.805	14.1008	131.445	1.86966
CM17B_9	227.116	0.258334	46.7217	1.71243	0.0682312	1.22973	136.519	2.31279	875.585	25.254	136.519	2.31279
CM17B_8	742.363	0.375188	47.9877	1.5793	0.0536064	1.14197	132.954	2.0779	354.549	25.5885	132.954	2.0779
CM17B_7	224.046	0.226155	47.839	1.74718	0.0486247	1.39854	133.363	2.30574	129.789	32.565	133.363	2.30574
CM17B_6	700.251	0.320625	47.1412	1.59179	0.0506407	0.881241	135.317	2.13116	224.509	20.2468	135.317	2.13116
CM17B_5	359.133	0.303919	47.8867	1.61745	0.0491754	1.07983	133.232	2.13249	156.208	25.0829	133.232	2.13249
CM17B_4	903.038	0.543933	47.1509	1.75089	0.0591774	1.26849	135.289	2.34365	573.629	27.3493	135.289	2.34365
CM17B_3	2482.32	0.217917	46.7279	1.43008	0.0491968	0.535598	136.501	1.93126	157.224	12.4881	136.501	1.93126
CM4
CM4_44	300.965	0.562759	47.4861	1.64056	0.100134	1.75131	134.344	2.18082	1626.58	32.217	1626.58	2.18082
CM4_43	1559.28	0.540225	47.6942	1.46117	0.0486425	1.05172	133.764	1.93408	130.632	24.5526	133.764	1.93408
CM4_42	731.19	0.415637	50.2273	1.34294	0.0521602	1.51102	127.084	1.68973	292.438	34.1451	127.084	1.68973
CM4_41	925.171	0.460838	46.4354	1.30459	0.0495732	1.24171	137.352	1.77268	175.031	28.7137	137.352	1.77268
CM4_40	458.706	0.386096	47.7632	1.40634	0.0522641	1.43606	133.573	1.85889	296.982	32.4417	133.573	1.85889
CM4_39	604.566	0.377114	47.9327	1.36863	0.0490497	1.5383	133.105	1.80279	150.206	35.6596	133.105	1.80279
CM4_38	898.033	0.399182	48.263	1.58117	0.0510293	1.87504	132.204	2.06874	242.155	42.6459	132.204	2.06874
CM4_37	424.468	0.439091	50.1586	1.49586	0.0481913	1.51194	127.256	1.88463	108.653	35.343	127.256	1.88463
CM4_36	1467.33	0.373911	49.1704	1.37849	0.058304	1.22489	129.788	1.77099	541.205	26.5616	129.788	1.77099
CM4_35	1605.3	0.304862	48.4141	1.35148	0.0495395	1.09652	131.795	1.76286	173.445	25.3896	131.795	1.76286
CM4_34	707.325	0.464217	47.3335	1.39398	0.0522461	1.38418	134.773	1.85893	296.196	31.2853	134.773	1.85893
CM4_33	775.354	0.554519	48.62	1.34178	0.0725738	1.87592	131.243	1.74295	1002.08	37.6243	131.243	1.74295
CM4_32	702.064	0.453821	51.3947	1.71198	0.0528323	2.10714	124.225	2.106	321.6	47.1756	124.225	2.106
CM4_31	1065.86	0.3982	49.1315	1.32069	0.0503741	1.14886	129.89	1.69806	212.292	26.4045	129.89	1.69806
CM4_30	1491.34	0.260868	46.663	1.29591	0.0492747	1.08423	136.689	1.75248	160.925	25.1648	136.689	1.75248
CM4_29	1281.94	0.466776	46.6127	1.31704	0.0492793	1.13917	136.835	1.78293	161.142	26.4286	136.835	1.78293
CM4_28	2533.37	0.676633	48.0047	1.58035	0.0503212	1.59848	132.908	2.07856	209.856	36.6386	132.908	2.07856
CM4_27	579.483	0.311324	50.2148	1.27843	0.057674	2.35981	127.115	1.60896	517.399	50.9874	127.115	1.60896
CM4_26	1035.92	0.435166	50.5445	1.16128	0.0482534	1.25834	126.294	1.4522	111.693	29.4532	126.294	1.4522
CM4_25	587.834	0.298492	49.2463	1.18536	0.0505293	1.62457	129.59	1.5206	219.416	37.1657	129.59	1.5206
CM4_23	2532.88	0.341166	50.2297	1.04937	0.0488147	1.00944	127.078	1.32032	138.938	23.5385	127.078	1.32032
CM4_21	393.905	0.36102	46.6677	1.32182	0.0486451	1.80665	136.675	1.78734	130.755	41.9545	136.675	1.78734
CM4_20	282.332	0.399104	49.4553	1.24424	0.0491138	1.57414	129.048	1.5895	153.266	36.4614	129.048	1.5895
CM4_19	409.09	0.40381	45.6107	1.2138	0.0515603	1.43144	139.809	1.67851	265.958	32.5179	139.809	1.67851
CM4_18	947.529	0.369789	48.6404	1.10466	0.0486543	1.16966	131.188	1.43437	131.2	27.2838	131.188	1.43437
CM4_16	775.541	0.448197	45.6353	1.46896	0.0509852	1.15577	139.734	2.03023	240.16	26.4287	139.734	2.03023
CM4_14	2235.03	0.579304	47.5928	1.45268	0.0492575	0.82344	134.046	1.92687	160.108	19.1569	134.046	1.92687
CM4_13	1035.13	0.54631	47.9579	1.47564	0.0559496	0.907412	133.036	1.94272	450.368	20.0282	133.036	1.94272
CM4_12	620.126	0.33558	47.5114	1.52275	0.0521708	1.18599	134.273	2.02319	292.905	26.8586	134.273	2.02319
CM4_11	677.077	0.451683	48.4218	1.80679	0.0532224	2.24833	131.774	2.35628	338.291	50.1403	131.774	2.35628
CM4_10	265.525	0.280017	46.9472	1.66537	0.0495259	1.60701	135.87	2.23868	172.804	37.0821	135.87	2.23868
CM4_9	311.935	0.47409	48.8594	1.58452	0.049742	1.64859	130.606	2.04834	182.957	37.9596	130.606	2.04834
CM4_7	946.6	0.418685	46.2242	1.46984	0.0544845	0.997306	137.973	2.00611	391.128	22.2263	137.973	2.00611
CM4_6	1770.75	0.399404	44.6714	1.44849	0.053654	0.878643	142.716	2.04419	356.557	19.717	142.716	2.04419
CM4_5	1277	0.311186	48.1055	1.46054	0.0499043	0.92296	132.632	1.91707	190.539	21.3323	132.632	1.91707
CM4_4	440.125	0.333448	45.5316	1.55537	0.0513513	1.42864	140.049	2.15442	256.632	32.5094	140.049	2.15442
CM4_3	631.491	0.308906	46.6012	1.93574	0.0517719	2.39417	136.868	2.62096	275.346	53.9368	136.868	2.62096
CM4_2	485.033	0.366602	46.0733	1.49963	0.048633	1.28741	138.42	2.05333	130.175	30.0166	138.42	2.05333
CM4_1	325.563	0.246927	46.4559	2.03365	0.0525206	2.10244	137.292	2.76192	308.14	47.1841	137.292	2.76192
CM10
CM10_49	2005	0.44835	47.7618	1.04076	0.0492754	0.833763	133.577	1.37576	160.954	19.3862	133.577	1.37576
CM10_48	805.82	0.322044	47.1221	1.21011	0.067335	1.25727	135.371	1.62085	848.153	25.9263	135.371	1.62085
CM10_47	1394.04	0.295612	47.7472	1.15182	0.0500162	0.983197	133.617	1.52301	195.747	22.6916	133.617	1.52301
CM10_45	1839.62	0.355278	48.1939	1.17083	0.0489747	1.13973	132.391	1.53409	146.615	26.514	132.391	1.53409
CM10_44	1108.42	0.323709	47.6494	1.09669	0.0507379	0.987732	133.888	1.45304	228.941	22.6585	133.888	1.45304
CM10_43	587.141	0.358778	47.7971	1.12647	0.0488524	1.20888	133.479	1.48797	140.746	28.1399	133.479	1.48797
CM10_42	752.197	0.282358	46.721	1.12319	0.048269	1.04855	136.521	1.51708	112.456	24.5688	136.521	1.51708
CM10_41	3690.41	0.216841	48.0252	1.04503	0.0514847	0.759908	132.851	1.37398	262.593	17.3545	132.851	1.37398
CM10_38	784.047	0.218113	46.131	1.11885	0.0489234	1.15595	138.248	1.53014	144.155	26.9006	138.248	1.53014
CM10_36	950.652	0.208317	48.7806	1.13921	0.0505132	1.00992	130.815	1.47506	218.677	23.207	130.815	1.47506
CM10_35	827.29	0.255371	48.5681	1.17646	0.0533632	1.10921	131.381	1.52982	344.269	24.9052	131.381	1.52982
CM10_34	1320.66	0.270337	48.2662	1.11187	0.0519624	0.888397	132.195	1.4547	283.757	20.1938	132.195	1.4547
CM10_33	1474.58	0.197536	47.4406	1.11311	0.0501243	0.960312	134.472	1.48115	200.761	22.1467	134.472	1.48115
CM10_32	2336.67	0.22871	48.5079	1.15578	0.0492474	1.056	131.543	1.50477	159.618	24.5214	131.543	1.50477
CM10_31	262.284	0.21883	48.4107	1.29496	0.048755	1.7407	131.804	1.68926	136.054	40.407	131.804	1.68926
CM10_30	1744.26	0.269481	47.6919	1.20102	0.0546927	0.976069	133.77	1.58986	399.681	21.7237	133.77	1.58986
CM10_28	2941.19	0.372608	47.208	1.06911	0.0492234	0.768447	135.127	1.42947	158.477	17.8821	135.127	1.42947
CM10_27	1166.54	0.326412	47.1193	1.14042	0.0492632	0.907256	135.379	1.52762	160.369	21.0858	135.379	1.52762
CM10_26	987.168	0.245767	48.0009	1.22183	0.0488809	1.28981	132.918	1.60721	142.11	30.0003	132.918	1.60721
CM10_24	217.132	0.241914	46.3325	1.29841	0.0500901	2.05497	137.654	1.76812	199.177	47.0437	137.654	1.76812
CM10_23	1130.79	0.221967	47.6728	1.09845	0.0527542	1.04297	133.823	1.45466	318.239	23.5368	133.823	1.45466
CM10_22	2103.41	0.623279	48.5525	1.10191	0.0492797	0.825487	131.423	1.43335	161.155	19.193	131.423	1.43335
CM10_21	302.506	0.403356	46.7679	1.26476	0.0492789	1.46952	136.385	1.7066	161.118	34.0163	136.385	1.7066
CM10_20	1057.56	0.302963	47.1692	1.22383	0.0519022	1.02788	135.237	1.63762	281.103	23.3528	135.237	1.63762
CM10_18	641.317	0.238249	47.0446	0.996573	0.050027	1.37185	135.592	1.33702	196.246	31.5732	135.592	1.33702
CM10_17	477.541	0.226446	47.8647	0.93522	0.0523525	1.1764	133.292	1.23366	300.835	26.6056	133.292	1.23366
CM10_16	2153.37	0.310413	47.1461	0.881664	0.0644906	1.79691	135.303	1.18038	757.762	37.4572	135.303	1.18038
CM10_15	675.762	0.201636	47.1634	0.93797	0.0513568	1.09161	135.254	1.2553	256.876	24.8977	135.254	1.2553
CM10_14	282.2	0.34108	48.2966	1.06298	0.0503859	1.66591	132.112	1.38988	212.833	38.1466	132.112	1.38988
CM10_13	2362.99	0.317371	47.9106	0.882754	0.0511711	0.712245	133.166	1.16336	248.546	16.3128	133.166	1.16336
CM10_12	740.779	0.376852	47.5928	0.908287	0.0493062	0.984307	134.046	1.20484	162.41	22.8594	134.046	1.20484
CM10_11	1933.98	0.458505	47.3908	0.848273	0.0502841	0.689769	134.611	1.12993	208.146	15.917	134.611	1.12993
CM10_10	2641.85	0.340414	48.1614	0.875238	0.0489192	0.632457	132.479	1.14758	143.945	14.7787	132.479	1.14758
CM10_9	1509.22	0.342118	48.5348	0.881893	0.0501508	0.717665	131.471	1.14759	201.987	16.5762	131.471	1.14759
CM10_8	342.495	0.260557	48.918	1.4469	0.0502607	1.49648	130.451	1.86825	207.069	34.3425	130.451	1.86825
CM10_7	1202.51	0.212129	46.916	1.34972	0.0487873	0.761089	135.96	1.81561	137.62	17.7817	135.96	1.81561
CM10_6	1290.14	0.387671	48.6204	1.31058	0.0487181	0.87846	131.242	1.70242	134.288	20.5194	131.242	1.70242
CM10_5	1434.83	0.385073	49.231	1.27605	0.0495118	0.781012	129.63	1.63741	172.14	18.1289	129.63	1.63741
CM10_4	2475.04	0.366794	47.7814	1.3125	0.0491272	0.946578	133.522	1.73422	153.906	22.0199	133.522	1.73422
CM10_3	1654.75	0.340259	49.1265	1.35708	0.0499584	0.814686	129.903	1.74501	193.057	18.8339	129.903	1.74501
CM10_2	670.9	0.210602	48.3858	1.58273	0.0472909	1.77455	131.872	2.06563	63.9089	41.7573	131.872	2.06563
CM10_1	3894.34	0.209578	50.812	1.39196	0.0501145	0.702645	125.636	1.73164	200.305	16.2352	125.636	1.73164
GCC1
GCC1-1	1108.36	0.186514	47.2622	0.0135	0.0492919	0.00974735	134.974	1.8032	161.756	22.7729	134.974	1.8032
GCC1-2	394.931	0.223165	47.491	0.0086	0.0485391	0.0302161	134.33	1.14329	125.605	71.1276	134.33	1.14329
GCC1-3	1074.85	0.152375	47.4342	0.0159	0.0496428	0.0199955	134.49	2.11623	178.28	46.606	134.49	2.11623
GCC1-4	1425.23	0.10817	47.7788	0.029	0.0478957	0.0537711	133.53	3.83253	94.1249	127.404	133.53	3.83253
GCC1-5	1879.15	0.476718	47.7384	0.00680002	0.0608011	0.0894122	133.641	0.89941	632.225	192.897	133.641	0.89941
GCC1-6	1251.02	0.292544	47.8389	0.012	0.0542204	0.100543	133.363	1.58392	380.194	226.564	133.363	1.58392
GCC1-7	1424.85	0.183728	46.2897	0.005	0.0490576	0.0147167	137.779	0.681587	150.563	34.4821	137.779	0.681587
GCC1-8	1203.8	0.379768	47.3814	0.0061	0.0493118	0.0180711	134.638	0.812774	162.659	42.2492	134.638	0.812774
GCC1-9	419.728	0.15876	45.5442	0.00500001	0.0484627	0.0275823	140.01	0.692505	121.911	64.9908	140.01	0.692505
GCC1-10	751.638	0.224795	47.3011	0.0102	0.0504142	0.0311965	134.864	1.36132	214.156	72.2753	134.864	1.36132
GCC1-13	914.807	0.217127	47.0476	0.005	0.0489479	0.0189364	135.583	0.670836	145.311	44.4413	135.583	0.670836
GCC1-14	1055.27	0.176735	47.9434	0.0121	0.0537762	0.140326	133.076	1.59371	361.667	317.922	133.076	1.59371
GCC1-15	1104.53	0.361995	46.7148	0.0242	0.0552038	0.0618966	136.539	3.26949	420.467	138.299	136.539	3.26949
GCC1-16	1133.51	0.127363	47.9883	0.0078	0.0511243	0.183336	132.953	1.02641	246.436	425.284	132.953	1.02641
GCC1-18	585.036	0.258343	46.5333	0.0072	0.049698	0.0248658	137.066	0.976456	180.869	57.9769	137.066	0.976456
GCC1-19	1311.35	0.140673	47.1753	0.0079	0.0488409	0.00800727	135.22	1.05711	140.183	18.8154	135.22	1.05711
GCC1-20	651.339	0.279539	47.3542	0.0052	0.0479755	0.0224467	134.714	0.693245	98.0823	53.1438	134.714	0.693245
GCC1-22	1761.95	0.212487	47.4774	0.0133	0.0493255	0.00996699	134.368	1.7686	163.31	23.2899	134.368	1.7686
GCC1-25	912.264	0.181925	47.0378	0.0163	0.0498266	0.0083221	135.611	2.18737	186.89	19.39	135.611	2.18737
GCC1-26	3171.16	0.253067	47.1739	0.0147	0.0515657	0.0170562	135.224	1.96709	266.21	39.1431	135.224	1.96709
GCC1-27	881.043	0.210547	46.678	0.00910001	0.0588051	0.204253	136.645	1.23039	559.905	449.488	136.645	1.23039
GCC1-28	2266.84	0.21654	47.7202	0.0104	0.050328	0.0132134	133.692	1.37608	210.168	30.6518	133.692	1.37608
GCC1-29	1092.61	0.326134	47.4574	0.00930001	0.0547014	0.15641	134.425	1.2372	400.019	352.35	134.425	1.2372
GCC1-30	1951.76	0.406972	47.2844	0.0081	0.0491849	0.0306705	134.911	1.08143	156.664	71.7855	134.911	1.08143
GCC1-31	3091.06	0.414364	47.0156	0.007	0.0502875	0.0162367	135.674	0.939797	208.327	37.6598	135.674	0.939797
GCC1-32	1040.19	0.249452	47.5037	0.005	0.0502811	0.0207262	134.295	0.664528	207.984	48.0655	134.295	0.664528
GCC1-33	63.9804	6.15371	47.5811	0.00880002	0.0545784	0.0462717	134.079	1.16771	394.971	103.827	134.079	1.16771
GCC1-35	1631.84	0.286541	47.1274	0.009	0.0515685	0.0103853	135.356	1.2055	266.31	23.8299	135.356	1.2055
GCC1-36	876.008	0.291827	47.5355	0.0162	0.0489817	0.0156164	134.206	2.15166	146.977	36.6139	134.206	2.15166
GCC1-37	1639.7	0.194046	47.5366	0.0062	0.0490683	0.0114638	134.203	0.823457	151.098	26.8624	134.203	0.823457
GCC1-38	311.996	0.158499	47.5408	0.0124	0.0491328	0.0462525	134.191	1.64677	154.151	108.353	134.191	1.64677
GCC1-39	566.555	0.246027	47.1957	0.0077	0.0499528	0.0320527	135.162	1.02991	192.82	74.5493	135.162	1.02991
GCC1-40	2017.43	0.256185	47.0138	0.0085	0.0495018	0.00780297	135.679	1.14122	171.647	18.2277	135.679	1.14122
GCC1-41	850.012	0.353468	47.2839	0.005	0.0519891	0.0282281	134.913	0.667554	284.952	64.5552	134.913	0.667554
GCC1-43	453.46	0.166642	47.1258	0.0215	0.048699	0.020365	135.36	2.87991	133.378	47.8576	135.36	2.87991
GCC1-45	602.602	0.0830199	47.6772	0.0122	0.0517287	0.0452045	133.811	1.61567	273.414	103.634	133.811	1.61567
GCC7A
GCC7A-1	213.872	0.278532	44.4638	0.0073	0.0481273	0.0597256	143.375	1.03508	105.507	141.234	143.375	1.03508
GCC7A-2	1126.06	0.336811	44.1256	0.0129	0.0503326	0.016627	144.462	1.84283	210.404	38.5613	144.462	1.84283
GCC7A-3	545.255	0.289383	44.9942	0.0158	0.0591804	0.138059	141.703	2.21448	573.732	301.534	141.703	2.21448
GCC7A-4	1258.25	0.170126	44.9822	0.0138	0.0488052	0.0253487	141.741	1.93467	138.492	59.5667	141.741	1.93467
GCC7A-5	784.167	0.377903	44.3033	0.0107	0.0484091	0.136618	143.889	1.52255	119.332	323.281	143.889	1.52255
GCC7A-6	1459.97	0.178065	44.7341	0.005	0.0504203	0.0197224	142.518	0.704771	214.436	45.7061	142.518	0.704771
GCC7A-8	1051.52	0.130188	44.3137	0.005	0.0497861	0.0132817	143.855	0.71131	184.997	30.9302	143.855	0.71131
GCC7A-10	613.197	0.213615	44.3446	0.005	0.0482436	0.0148932	143.756	0.710824	111.21	35.1807	143.756	0.710824
GCC7A-11	367.395	0.20141	44.844	0.0085	0.0475864	0.049196	142.172	1.19524	78.7302	116.892	142.172	1.19524
GCC7A-12	405.718	0.219357	44.5484	0.019	0.0482743	0.0392103	143.106	2.68905	112.732	92.5612	143.106	2.68905
GCC7A-13	478.935	0.202314	44.7223	0.0126	0.047256	0.137357	142.555	1.77648	62.1824	328.517	142.555	1.77648
GCC7A-14	338.959	0.182557	44.6676	0.005	0.0482537	0.0308733	142.728	0.705798	111.718	72.8633	142.728	0.705798
GCC7A-15	253.762	0.190196	45.051	0.0121	0.0469131	0.043371	141.526	1.69381	44.7953	103.677	141.526	1.69381
GCC7A-17	274.797	0.215041	44.8533	0.0119	0.047713	0.0881915	142.143	1.673	85.0869	209.522	142.143	1.673
GCC7A-18	884.925	0.202238	44.2029	0.0057	0.0477686	0.0300872	144.212	0.81288	87.8467	71.3503	144.212	0.81288
GCC7A-19	661.462	0.193406	44.4883	0.0056	0.0479379	0.022691	143.297	0.793609	96.205	53.7296	143.297	0.793609
GCC7A-20	542.241	0.265207	44.1678	0.0069	0.0487436	0.0387211	144.325	0.984777	135.493	90.9988	144.325	0.984777
GCC7A-21	730.011	0.16942	44.2855	0.0063	0.0482909	0.01497	143.946	0.896809	113.523	35.3452	143.946	0.896809
GCC7A-22	437.287	0.205779	44.2604	0.005	0.0483464	0.0183317	144.027	0.712148	116.239	43.2437	144.027	0.712148
GCC7A-25	422.861	0.391706	44.4609	0.00990003	0.0497501	0.128088	143.384	1.40384	183.309	299.417	143.384	1.40384
GCC7A-26	513.373	0.314488	44.1976	0.0085	0.0500251	0.0599812	144.229	1.21233	196.181	139.475	144.229	1.21233
GCC7A-27	1143.11	0.252008	44.2035	0.0057	0.0492686	0.0193319	144.21	0.81287	160.639	45.2093	144.21	0.81287
GCC7A-28	583.769	0.310715	44.5445	0.0076	0.0479535	0.0326942	143.118	1.07571	96.9532	77.3829	143.118	1.07571
